# Supplementary material for: An anti-galvanic reduction single-molecule fluorescent probe for detection of Cu(ii)
Source: Royal Society of Chemistry journal article supplement (doi:10.1039/c3ra46877a), 2014-01-01
Supplement: c3ra46877a.pdf [file c3ra46877a.pdf]

**Supporting :**

**An anti-galvanic reduction single-molecule fluorescent probe for detection of  
Cu(II)**

Shuxin Wang, Xiangming Meng, and Manzhou Zhu\*

<sup>1</sup>Department of Chemistry, Anhui University, Hefei, Anhui 230039, P. R. China;

\*Corresponding author: [zmz@ahu.edu.cn](mailto:zmz@ahu.edu.cn)

**Contents**

|                                                                                               |   |
|-----------------------------------------------------------------------------------------------|---|
| Materials. ....                                                                               | 2 |
| Synthesis of [Ag <sub>62</sub> S <sub>13</sub> (SBut) <sub>32</sub> ] <sup>4+</sup> NCs ..... | 2 |
| Single-molecule imaging .....                                                                 | 2 |
| Characterization.....                                                                         | 2 |
| Figure S1 HRTEM image.....                                                                    | 3 |
| Figure S2 Survey Bonding Energy. ....                                                         | 4 |
| Figure S3 MALDI-TOF mass spectra.....                                                         | 5 |
| References .....                                                                              | 5 |

## Experimental

### Materials.

Silver tetrafluoroborate ( $\text{AgBF}_4$ , 99%), silver nitrate (99%), 2-methylpropane-2-thiol (99%), hydrazine hydrate (80%), were used as received from Aldrich. HPLC-grade methanol was purchased from Aldrich and used as received. Pure water was from Wahaha Co LTD.,  $\text{AgSBU}^t$  was prepared by reacting equivalent amounts of  $\text{AgNO}_3$  with  $\text{HSBU}^t$  in the presence of  $\text{Et}_3\text{N}$ .

### Synthesis of $[\text{Ag}_{62}\text{S}_{13}(\text{SBU}^t)_{32}]^{4+}$ NCs

$[\text{Ag}_{62}\text{S}_{13}(\text{SBU}^t)_{32}]^{4+}$  NCs were synthesized referring to the reported method.<sup>1</sup> Briefly,  $\text{AgSBU}^t$  (39.8 mg, 0.202 mmol) was dispersed in 10 mL methanol under ultrasonication, then  $\text{AgBF}_4$  (20.6 mg, 0.106 mmol) dissolved in 0.5 mL methanol was added. To the resulting solution 6  $\mu\text{L}$   $\text{N}_2\text{H}_4\cdot\text{H}_2\text{O}$  (50% w/w in water) was added with stirring for 1 h in r. t.. The reaction mixture was kept at 60°C for another 20 h in the Schlenk flask. After cooled to room temperature, the red solution was filtered and the filtrate was dried by rotary evaporation. The obtained product was washed with hexane and re-dissolved in methanol. This process was repeated at least 5 times to completely remove the impurity.

### Single-molecule imaging<sup>2</sup>

Monitoring of Fluorescence Signal Process under Zeiss LSM 710 Confocal Fluorescence Microscope. To immobilize and disperse the NCs, triethylene glycol (1  $\mu\text{L}$ ) was added into the solution of  $[\text{Ag}_{62}\text{S}_{13}(\text{SBU}^t)_{32}]^{4+}$  NCs and  $\text{Ag}_{62}\text{-Cu}^{2+}$  NCs (500 nM, 10  $\mu\text{L}$ ), then 1  $\mu\text{L}$  of the mixture solution was dropped on the petri dishes and dried at r. t.. After the samples were dried, the fluorescence images were taken using a Plan-Apochromat 100x/1.40 Oil DIC M27 objective, recorded by using fast scanning,  $\theta = 3.15 \mu\text{s}$  per pixel. Synthesis of  $[\text{Au}_{11}(\text{PPh}_3)_8\text{Cl}_2]^+$ .

### Characterization

The optical spectra of the  $[\text{Ag}_{62}\text{S}_{13}(\text{SBU}^t)_{32}]^{4+}$  clusters (solvent:  $\text{MeCN}:\text{H}_2\text{O}=1:1$ ) were measured on Hewlett-Packard (HP) Agilent 8453 diode array spectrophotometer at

room temperature. Fluorescence spectra were recorded on a FL-4500 spectrofluorometer. For the convenience of comparison, the excitation wavelength was set at 535 nm for all the cluster species in emission measurements. MALDI-TOF-MS were performed on a Bruker autoflex III time-of-flight (TOF) mass spectrometer. Trans-2-[3-(4-tert-butylphenyl)-2-methyl-2-propenyldiene] malononitrile (DCTB) was used as the matrix for MALDI. TEM images were obtained by JEM 2100.

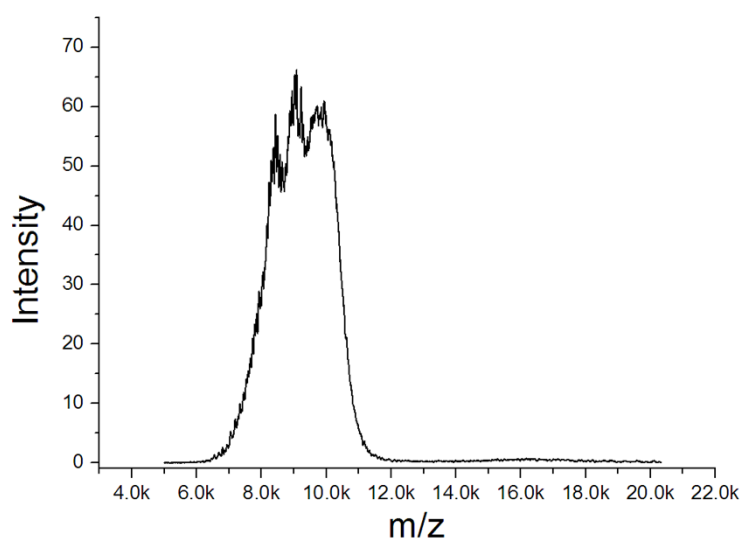

**Figure S1** MALDI-TOF-MS of  $[\text{Ag}_{62}\text{S}_{13}(\text{SBu}^{\text{t}})_{32}]^{4+}$ .

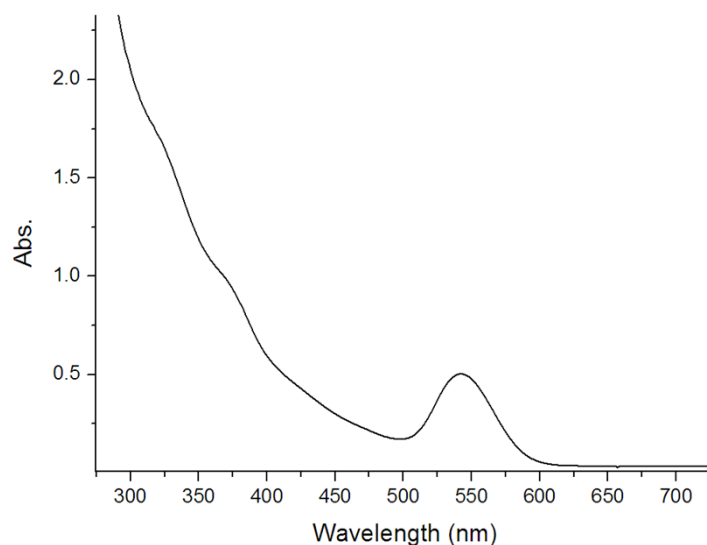

**Figure S2** UV-Vis spectrum of  $[\text{Ag}_{62}\text{S}_{13}(\text{SBu}^{\text{t}})_{32}]^{4+}$ , measured in MeOH.

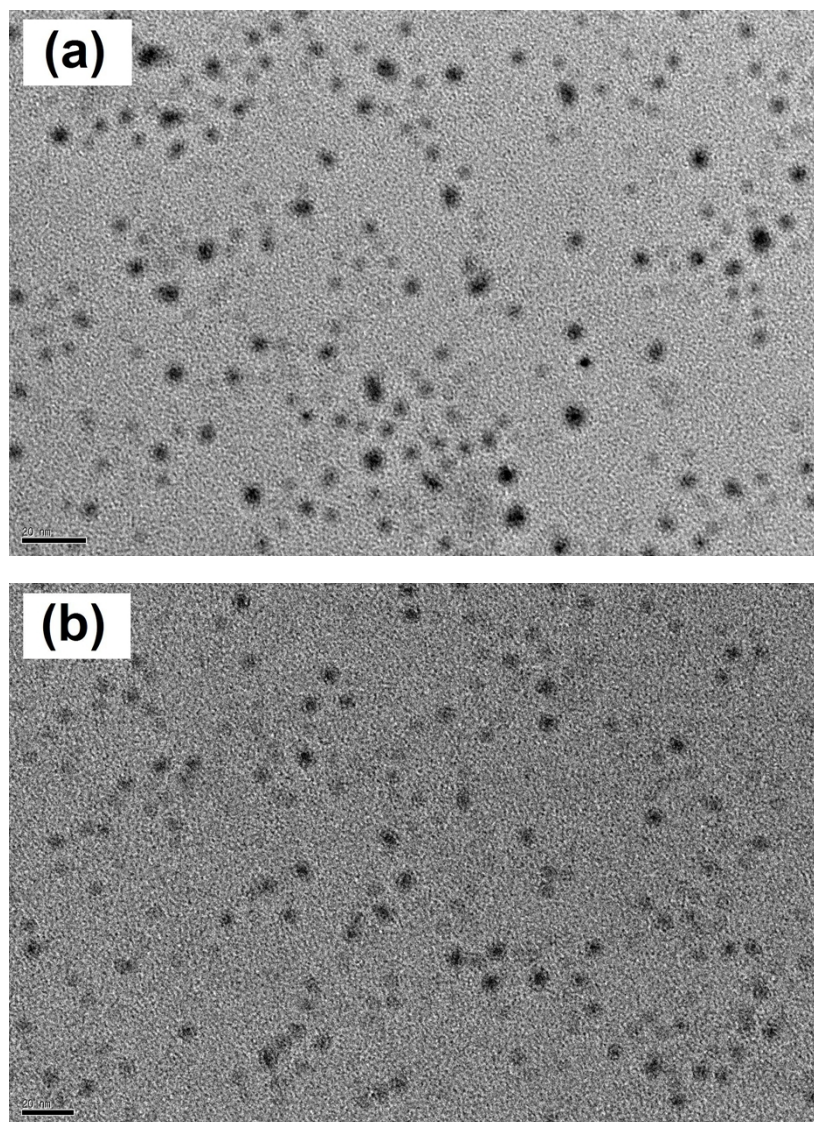

**Figure S3** (a) Typical HRTEM image of initial  $[\text{Ag}_{62}\text{S}_{13}(\text{SBu}^+)_{32}]^{4+}$ . (b) After addition of 1equiv  $\text{Cu}^{2+}$ . The scale bar is 20 nm.

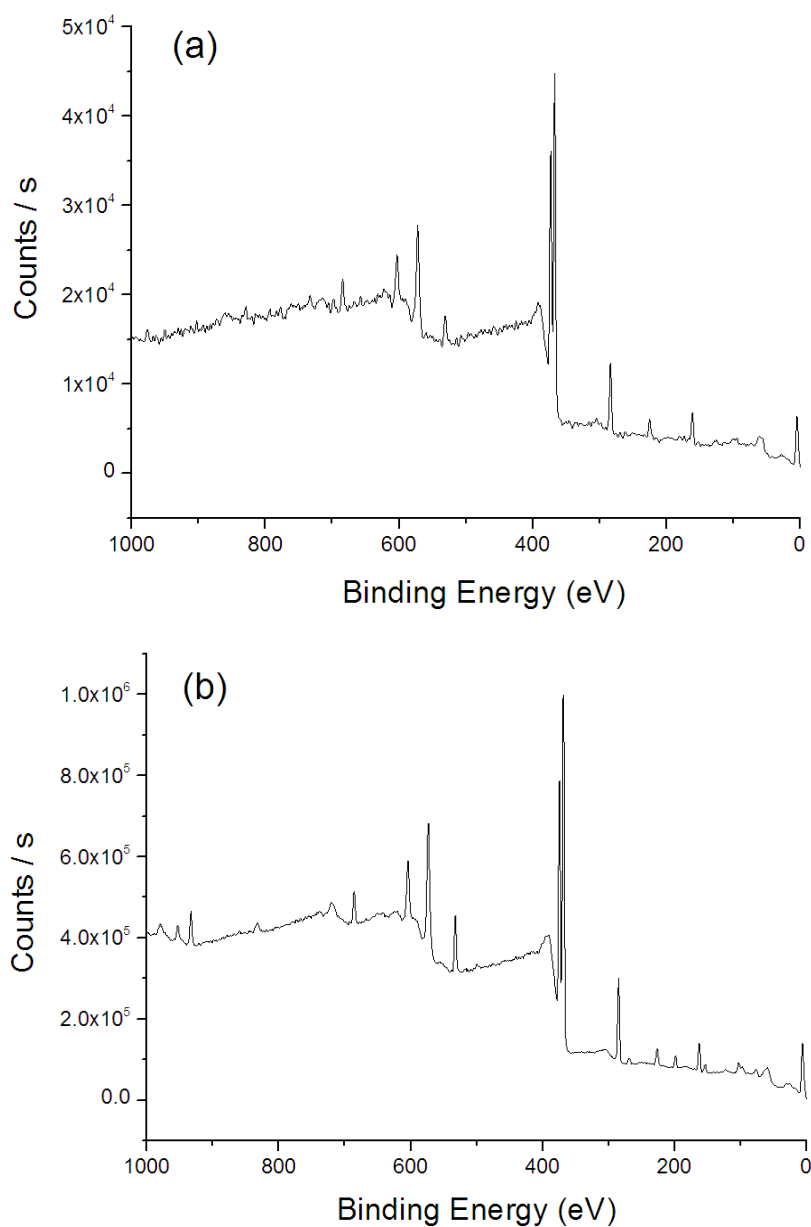

**Figure S4** survey energy of (a) [Ag<sub>62</sub>S<sub>13</sub>(SBu<sup>t</sup>)<sub>32</sub>]<sup>4+</sup> NCs, (b) [Ag<sub>62</sub>S<sub>13</sub>(SBu<sup>t</sup>)<sub>32</sub>]<sup>4+</sup> NCs after addition of 1 equiv Cu(II).

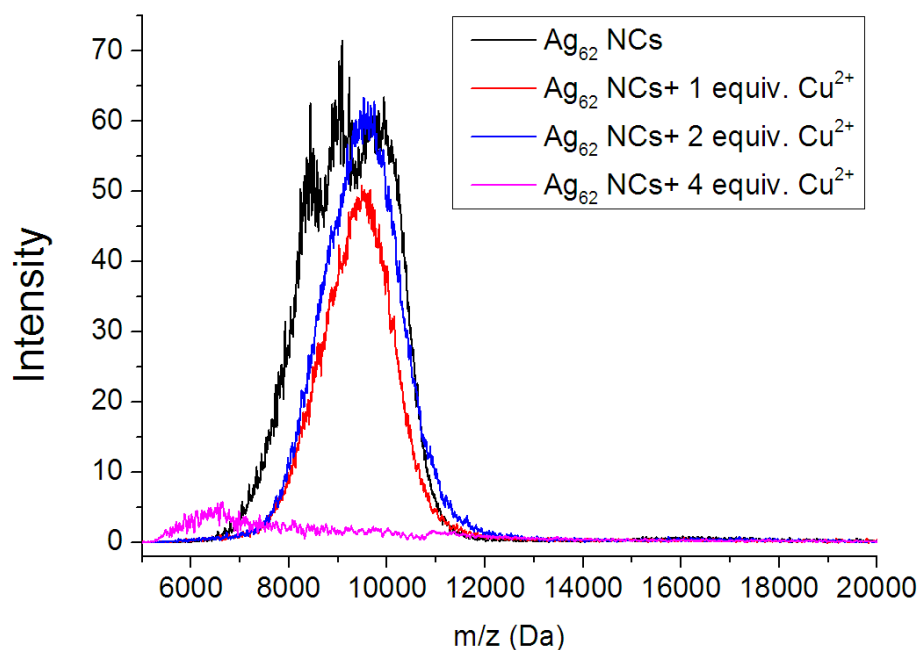

**Figure S5** MALDI-TOF mass spectra of the  $[\text{Ag}_{62}\text{S}_{13}(\text{SBu}^t)_{32}]^{4+}$  NCs (black line) before and after addition of 1 equiv  $\text{Cu}^{2+}$  (red line), 2 equiv (blue line) and 4 equiv (Magenta line), respectively.

## References

1. G. Li, Z. Lei, Q. -M. Wang, *J. Am. Chem. Soc.* **2012**, *132*, 17678.
2. W. Luo, K. He, T. Xia, X. Fang, *Anal. Bioanal. Chem.* **2013**, *405*, 43.
